# Supplementary material for: Construct-level predictive validity of educational attainment and intellectual aptitude tests in medical student selection: meta-regression of six UK longitudinal studies
Source: BMC Med. 2013 Nov 14;11:243. doi: 10.1186/1741-7015-11-243 (PMC3827328; doi:10.1186/1741-7015-11-243)
Supplement: Additional file 2 — This Excel spreadsheet carries out calculations for the standard method of Hunter, Schmidt and Le, and provides examples of effects when reliability and range restriction are varied with a fixed correlation between predictor and outcome in the restricted population. [file 1741-7015-11-243-S2.xlsx]

## Sheet: Calculations
Implementation of sequential process for Indirect Range Restriction, Hunter Schmidt & Le, 2006, J App Psych 91(3),594-612, Table 2
For a copy of Table 2 from Hunter et al, see the separate tab, below. Also scroll down to lines 31 onwards to see the individual steps of the Hunter et al calculation.
This spreadsheet solves the equations of Hunter et al's Table 2. Any values can be input, but beware that seriously wrong errors are not trapped (e.g. square roots of negative numbers)
Sets 1 to 9 below demonstrate the effect of different values of the reliability of X (row 14) and of range restriction (row 16) on Construct Validity (row 23, in red).
The correlation of X and Y in the restricted population is here fixed at 0.4 in all cases. See the Commentary Tab for more information.
See Commentary Tab for explanation and further details.
Important note: Only alter the input measures (shown in blue font)
Input measures		Set 1	Set 2	Set 3	Set 4	Set 5	Set 6	Set 7	Set 8	Set 9
Correlation of X and Y in restricted population	rXYi	0.4	0.4	0.4	0.4	0.4	0.4	0.4	0.4	0.4
Reliability of Y in the restricted population	rYYi	1	1	1	1	1	1	1	1	1
Reliability of X in the unrestricted population	rXXa	1	0.8	0.6	1	0.8	0.6	1	0.8	0.6
Reliability of X in restricted population (only needed if rXXa not known -- see step 5)	rXXi	0	0	0	0	0	0	0	0	0
Range restriction on X (uX =SD(incumbents)/SD(overall))	uX	1	1	1	0.9	0.9	0.9	0.8	0.8	0.8
Output measures
Correlation of X and P in restricted population	rXPi	0.4	0.4	0.4	0.4	0.4	0.4	0.4	0.4	0.4
Reliability of X in the restricted population	rXXi	1	0.8	0.6	1	0.753086	0.506173	1	0.6875	0.375
Correlation between T and P in the restricted population	rTPi	0.4	0.447214	0.516398	0.4	0.460933	0.562226	0.4	0.482418	0.653197
Reliability of X in unrestricted population (if not known)	rXXa(*)	0	0	0	0.19	0.19	0.19	0.36	0.36	0.36
Range restriction on T	uT	1	1	1	0.9	0.873212	0.82664	0.8	0.74162	0.632456
Correlation of t and P in unrestricted population (Construct Validity)	rTPa	0.4	0.447214	0.516398	0.436332	0.511215	0.6352	0.478913	0.596202	0.806478
Correlation between X and P in the unrestricted population (Operational Validity)	rXPa	0.4	0.4	0.4	0.436332	0.457244	0.492024	0.478913	0.533259	0.624695
Step 1	Correction for measurement error in Y (measure of construct P)
Correlation of X and P in restricted population	rXPi	0.4	0.4	0.4	0.4	0.4	0.4	0.4	0.4	0.4
Step 2	Estimating reliability of X in the restricted population
Reliability of X in the restricted population	rXXi	1	0.8	0.6	1	0.753086	0.506173	1	0.6875	0.375
Step 3	Correcting for measurement error in X (measure of construct T)
Correlation between T and P in the restricted population	rTPi	0.4	0.447214	0.516398	0.4	0.460933	0.562226	0.4	0.482418	0.653197
Step 4	Estimating reliability of X in the unrestricted population [can be ignored if rXXa already known]
Reliability of X in unrestricted population (if not known)	rXXa(*)	0	0	0	0.19	0.19	0.19	0.36	0.36	0.36
Step 5	Estimating range restriction on T
Range restriction on T	uT	1	1	1	0.9	0.873212	0.82664	0.8	0.74162	0.632456
Step 6	Correcting for the effect of indirect range restriction
Correlation of t and P in unrestricted population	rTPa	0.4	0.447214	0.516398	0.436332	0.511215	0.6352	0.478913	0.596202	0.806478
Step 7	Reintroducing measurement error I T to estimate operational validity of X as a measure of T
Correlation between X and P in the unrestricted population	rXPa	0.4	0.4	0.4	0.436332	0.457244	0.492024	0.478913	0.533259	0.624695
